# Supplementary material for: Eco-Friendly Depolymerization of Alginates by H2O2 and High-Frequency Ultrasonication
Source: MDPI journal article supplement (doi:10.3390/cleantechnol5040069), 2023-12-06

# Eco-Friendly Depolymerization of Alginates by H<sub>2</sub>O<sub>2</sub> and High-Frequency Ultrasonication

Yun Ha Song, Hee Chul Woo \* and Jaekyoung Lee \*

**Table S1.** The molecular weight and polydispersity of the products based on oxidation reaction temperature and the use of oxidants

| Reaction temperature (°C) | Molecular weight, Mw (Da)     |                                                               | Polydispersity (Dp)           |                                                               |
|---------------------------|-------------------------------|---------------------------------------------------------------|-------------------------------|---------------------------------------------------------------|
|                           | H <sub>2</sub> O <sub>2</sub> | H <sub>2</sub> O <sub>2</sub> +Fe <sub>3</sub> O <sub>4</sub> | H <sub>2</sub> O <sub>2</sub> | H <sub>2</sub> O <sub>2</sub> +Fe <sub>3</sub> O <sub>4</sub> |
| Alginate                  | 906,000                       | -                                                             | 4.8                           | -                                                             |
| 70                        | 4,230                         | 2,730                                                         | 1.52                          | 1.39                                                          |
| 90                        | 2,380                         | 1,640                                                         | 1.36                          | 1.44                                                          |
| 110                       | 840                           | 940                                                           | 1.58                          | 1.62                                                          |
| 130                       | 790                           | 860                                                           | 1.48                          | 1.46                                                          |

**Table S2.** Peak assignments for carboxylic anions, aliphatic C-H, glycosidic linkage, pyranose ring, and uronic acid group

| Wavelength(cm <sup>-1</sup> ) | Assignment         |
|-------------------------------|--------------------|
| 1408 and 1594                 | Carboxyl anions    |
| 831 and 1448                  | Aliphatic C-H      |
| 1170                          | Glycosidic linkage |
| 1045, 1080 and 1125           | Pyranose ring      |
| 950                           | Uronic acid group  |

**Table S3.** The molecular weight for each raw material and products of ultrasonication

| Reaction time (h) | Molecular weight, Mw (Da) |       |     |     |       |       |       |      |
|-------------------|---------------------------|-------|-----|-----|-------|-------|-------|------|
|                   | 70                        | 90    | 110 | 130 | F70   | F90   | F110  | F130 |
| 0                 | 4,230                     | 2,380 | 840 | 790 | 2,730 | 1,640 | 940   | 860  |
| 3                 | 3,960                     | 2,390 | 930 | 850 | 2,530 | 1,670 | 1,060 | 970  |
| 6                 | 3,410                     | 2,370 | 920 | 850 | 2,420 | 1,660 | 1,060 | 970  |
| 10                | 3,380                     | 2,310 | 940 | 850 | 2,210 | 1,690 | 1,040 | 980  |

**Table S4.** The polydispersity for each raw material and products of ultrasonication

| Reaction time (h) | Polydispersity (PD) |      |      |      |      |      |      |      |
|-------------------|---------------------|------|------|------|------|------|------|------|
|                   | 70                  | 90   | 110  | 130  | F70  | F90  | F110 | F130 |
| 0                 | 1.52                | 1.36 | 1.58 | 1.48 | 1.39 | 1.44 | 1.62 | 1.46 |
| 3                 | 1.50                | 1.32 | 1.24 | 1.24 | 1.36 | 1.43 | 1.31 | 1.24 |
| 6                 | 1.47                | 1.33 | 1.24 | 1.23 | 1.34 | 1.44 | 1.33 | 1.28 |
| 10                | 1.47                | 1.31 | 1.25 | 1.19 | 1.26 | 1.42 | 1.31 | 1.26 |

**Figure S1.** GPC spectra for raw alginate material and products after oxidative decomposition with (a)  $\text{H}_2\text{O}_2$ (70–130) and (b)  $\text{H}_2\text{O}_2+\text{Fe}_3\text{O}_4$  (F70–F130).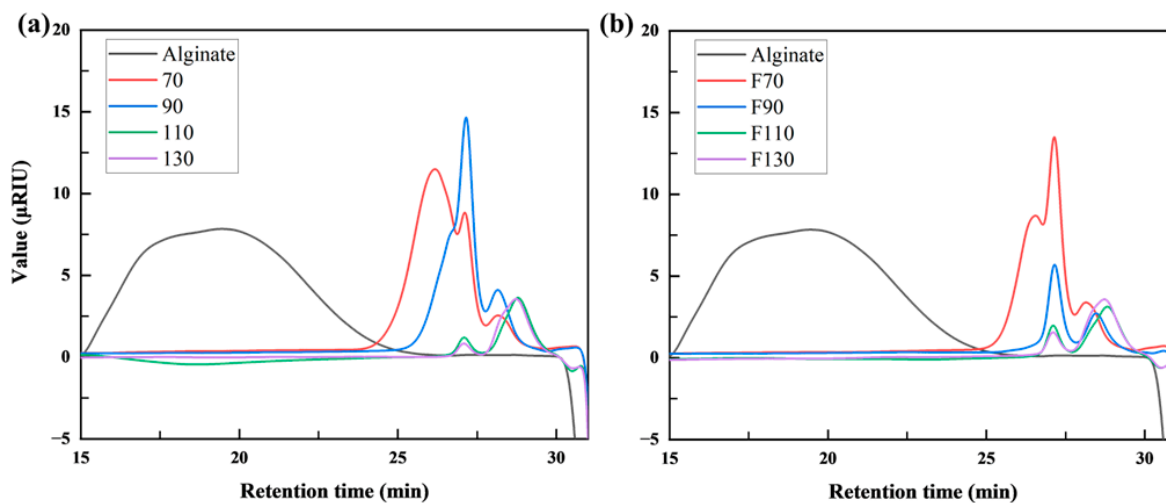

Supplement: s1 [file s1]
